# Supplementary material for: Potentially Toxic Element Levels in Atmospheric Particulates and Health Risk Estimation around Industrial Areas of Maros, Indonesia
Source: MDPI journal article supplement (doi:10.3390/toxics9120328), 2021-12-02
Supplement: s1 [file s1]

# Supplementary Materials: Potentially Toxic Element Levels in Atmospheric Particulates and Health Risk Estimation Around Industrial Areas of Maros, Indonesia

Annisa Utami Rauf, Anwar Mallongi, Kiyoungh Lee, Anwar Daud, Muhammad Hatta, Wesam Al Madhoun, Ratna Dwi Puji Astuti

**Table S1.** Average daily dose (ADD) values from inhalation, ingestion and dermal routes.

|          |        | Al                    | As                    | Cr                    | Cu                    | Ni                    | Pb                    | Zn                    |
|----------|--------|-----------------------|-----------------------|-----------------------|-----------------------|-----------------------|-----------------------|-----------------------|
| Adult    | ADDInh | $1.94 \times 10^{-6}$ | $1.06 \times 10^{-7}$ | $1.06 \times 10^{-7}$ | $9.55 \times 10^{-8}$ | $4.11 \times 10^{-9}$ | $1.65 \times 10^{-3}$ | $3.78 \times 10^{-5}$ |
|          | ADDIng | $1.27 \times 10^{-3}$ | $7.24 \times 10^{-5}$ | $7.22 \times 10^{-5}$ | $6.49 \times 10^{-5}$ | $2.79 \times 10^{-6}$ | $5.85 \times 10^{-4}$ | $2.57 \times 10^{-2}$ |
|          | ADDerm | $5.21 \times 10^{-6}$ | $9.63 \times 10^{-4}$ | $2.88 \times 10^{-7}$ | $2.59 \times 10^{-7}$ | $1.11 \times 10^{-8}$ | $2.33 \times 10^{-6}$ | $1.02 \times 10^{-4}$ |
| Children | ADDInh | $1.46 \times 10^{-6}$ | $7.84 \times 10^{-8}$ | $7.83 \times 10^{-8}$ | $7.03 \times 10^{-8}$ | $3.02 \times 10^{-9}$ | $1.21 \times 10^{-3}$ | $2.78 \times 10^{-5}$ |
|          | ADDIng | $4.94 \times 10^{-3}$ | $2.80 \times 10^{-4}$ | $2.80 \times 10^{-4}$ | $2.51 \times 10^{-4}$ | $1.08 \times 10^{-5}$ | $2.26 \times 10^{-3}$ | $9.96 \times 10^{-2}$ |
|          | ADDerm | $1.41 \times 10^{-5}$ | $7.86 \times 10^{-7}$ | $7.84 \times 10^{-7}$ | $7.05 \times 10^{-7}$ | $3.03 \times 10^{-8}$ | $6.35 \times 10^{-6}$ | $2.79 \times 10^{-4}$ |

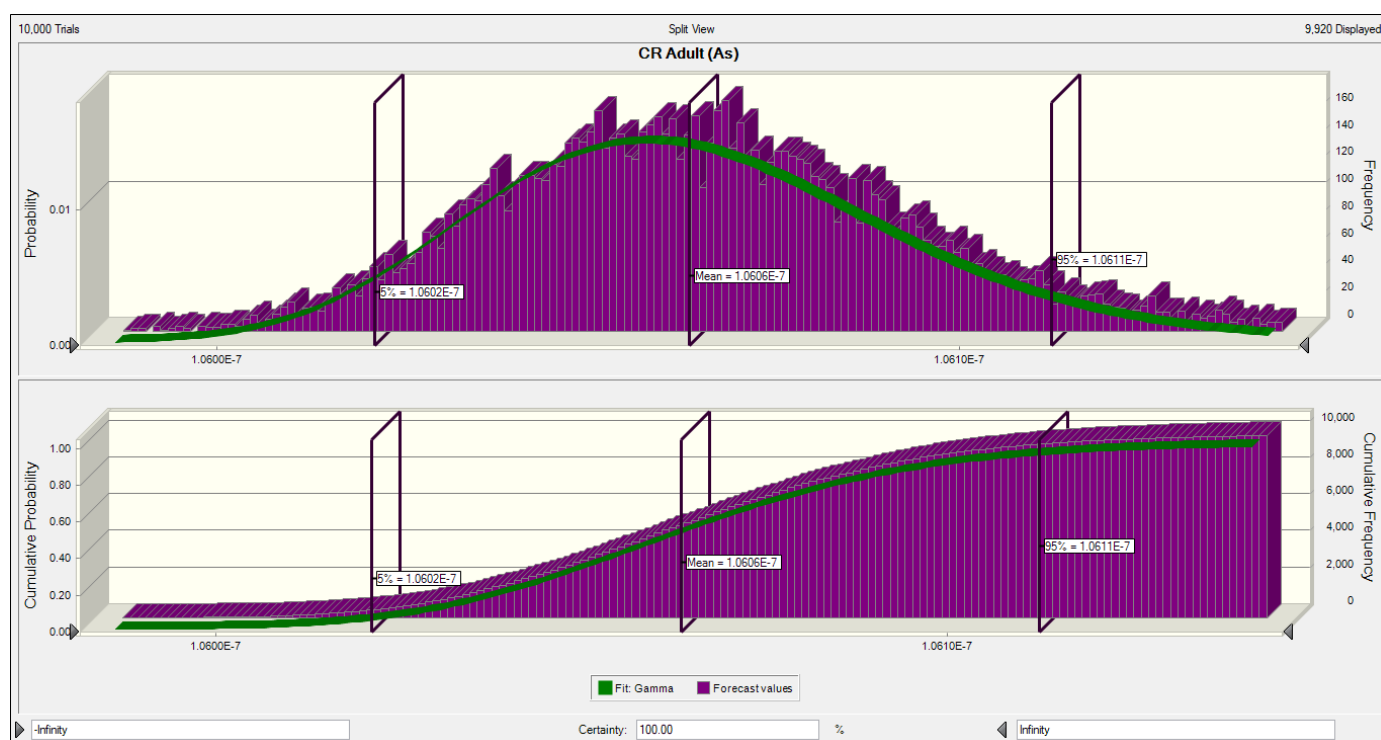

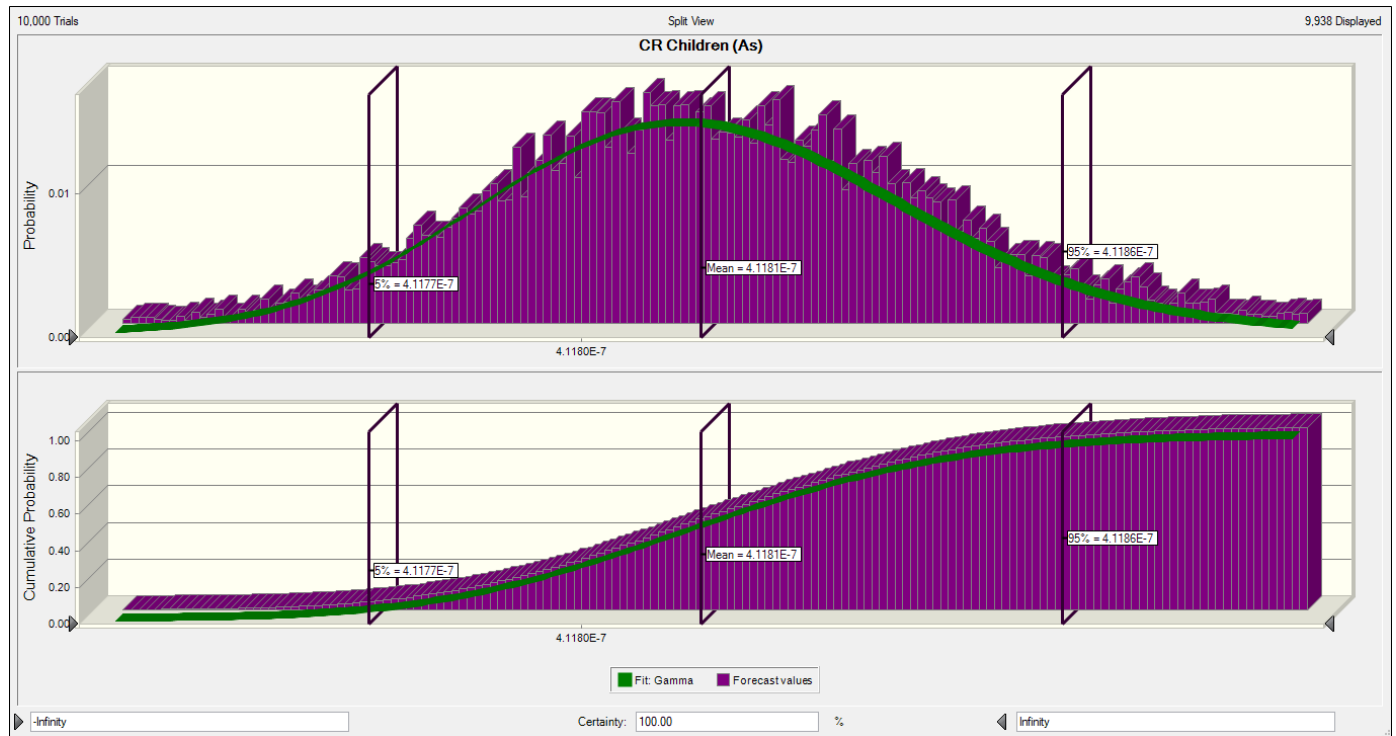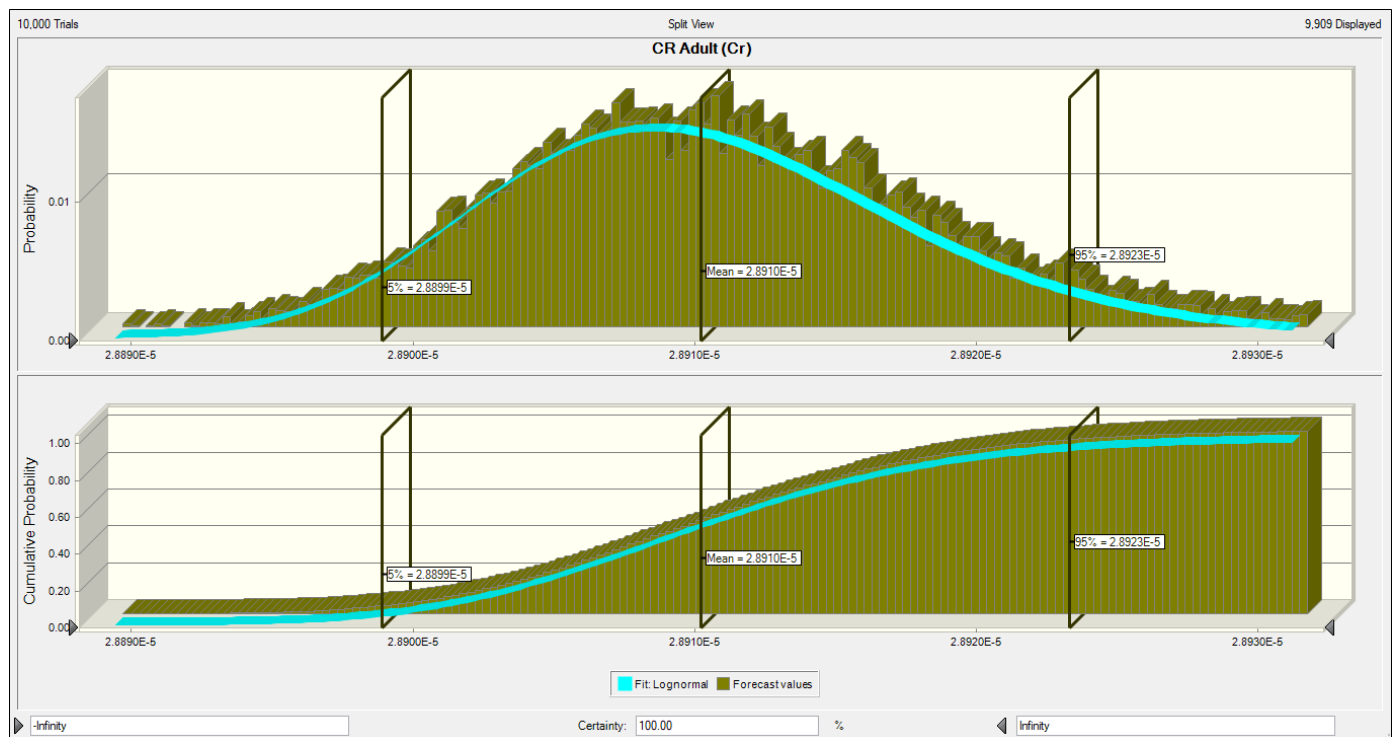

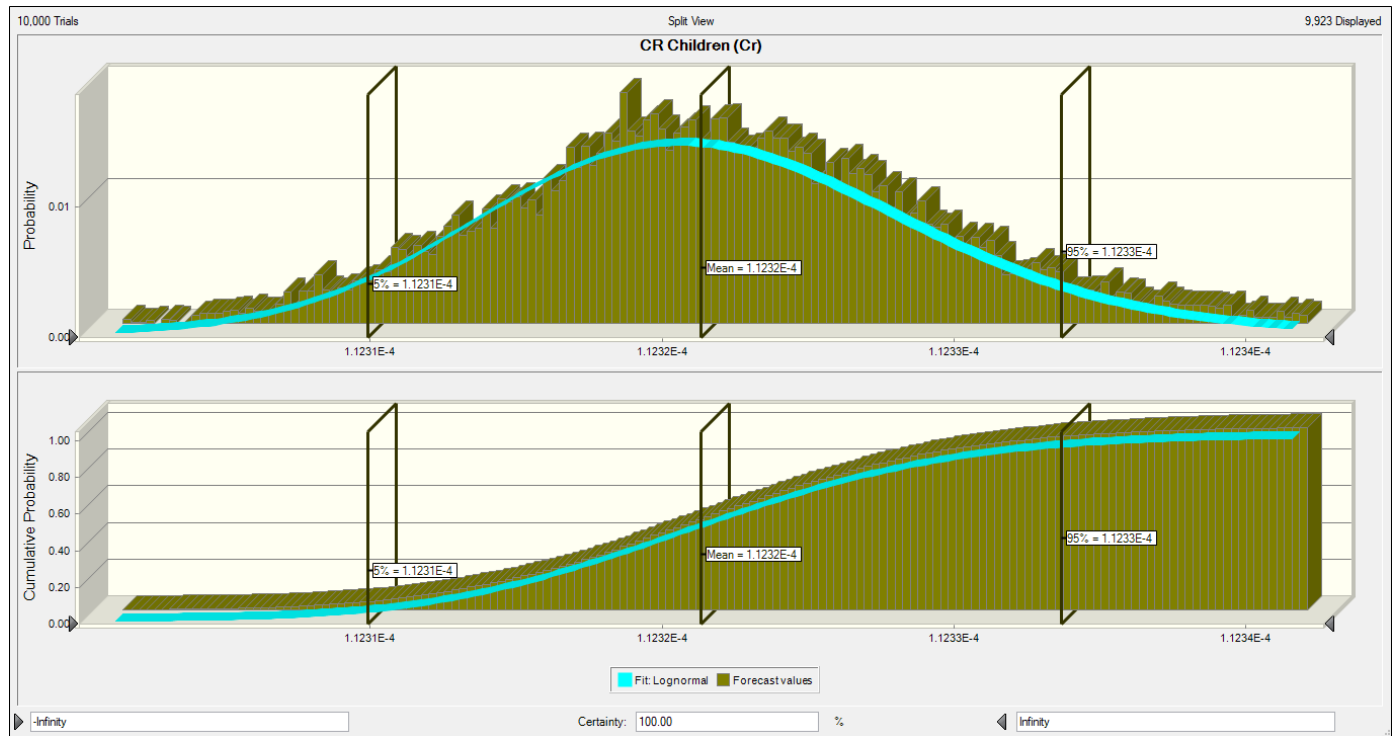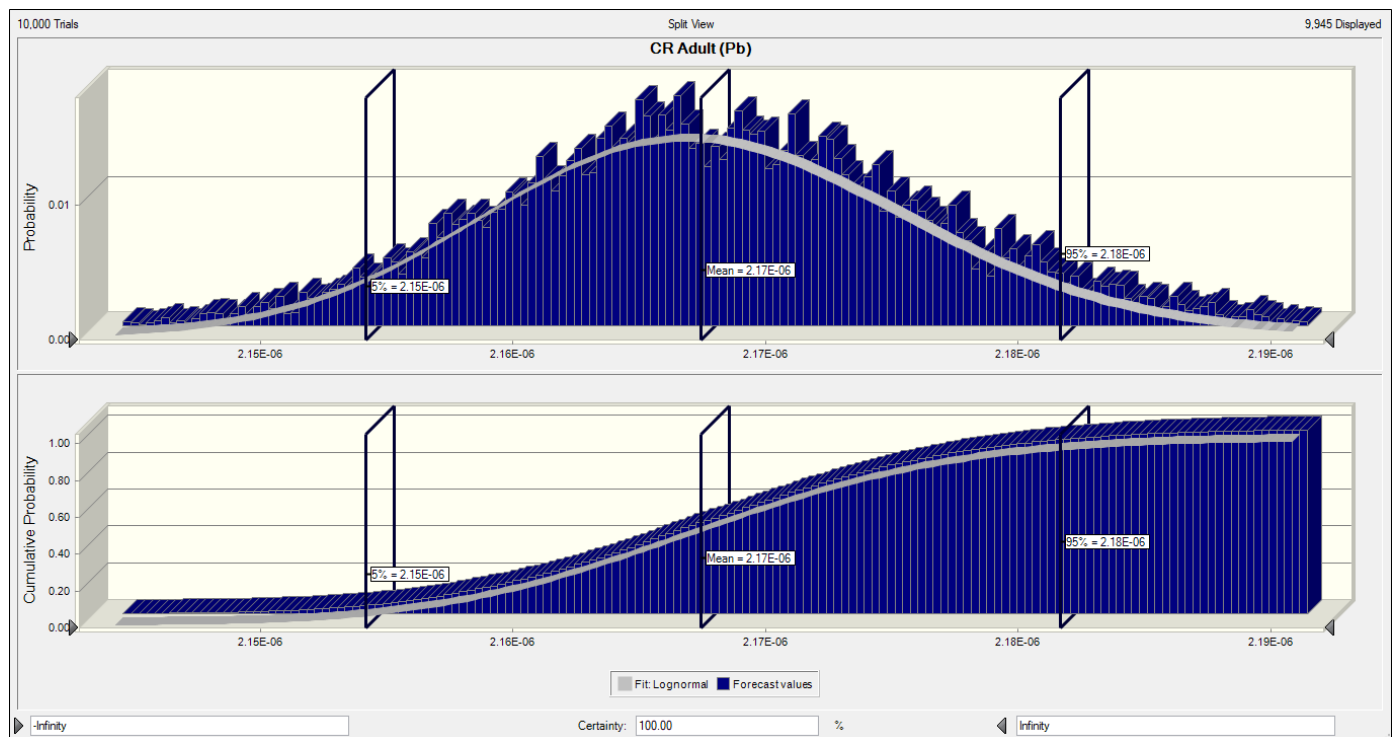

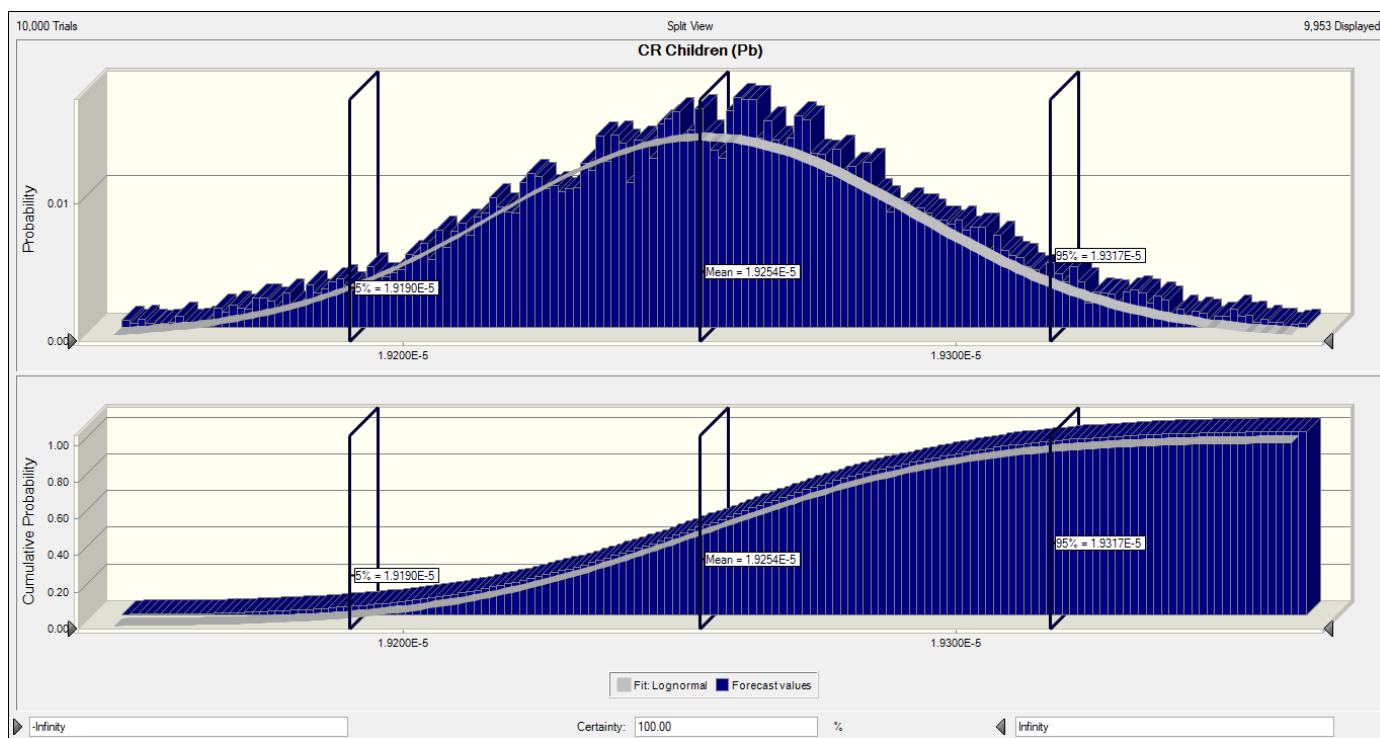

**Figure S1.** Distribution frequency of cancer risks (As, Cr and Pb) for adult and children.
